# Supplementary material for: Iron oxide nanocube assembly on silver nanowire templates to enhance magnetic hyperthermia performance
Source: Royal Society of Chemistry journal article supplement (doi:10.1039/d5nr03252k), 2026-01-01
Supplement: d5nr03252k1.pdf [file d5nr03252k1.pdf]

## *Supporting Information*

### **IRON OXIDE NANOCUBES ASSEMBLY ON SILVER NANOWIRE TEMPLATES TO ENHANCE MAGNETIC MAGNETIC HYPERTHERMIA PERFORMANCE**

**Tugce A. Arica<sup>1,2</sup>, Ecem Tiryaki<sup>2</sup>, Ehsan Sadeghi<sup>2,3</sup>, Abubakar R. Mannir<sup>2</sup>, Sinan Balci<sup>4</sup>,  
Teresa Pellegrino<sup>2</sup>**

*<sup>1</sup>Department of Materials Science and Engineering, Izmir Institute of Technology, 35433  
Izmir, Turkey*

*<sup>2</sup>Italian Institute of Technology, via Morego 30, 16163, Genoa, Italy*

*<sup>3</sup>Chemical and Chemical Industry Department, via Dodecaneso 31, 16146, Genoa, Italy*

*<sup>4</sup>Department of Photonics, Izmir Institute of Technology, 35433 Izmir, Turkey*

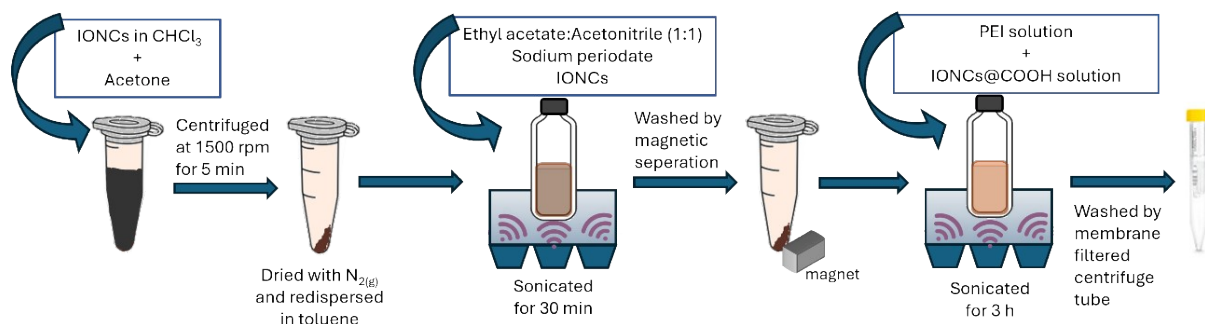

Scheme S1. Schematic view of the experimental procedure to surface functionalization IONCs with PEI.

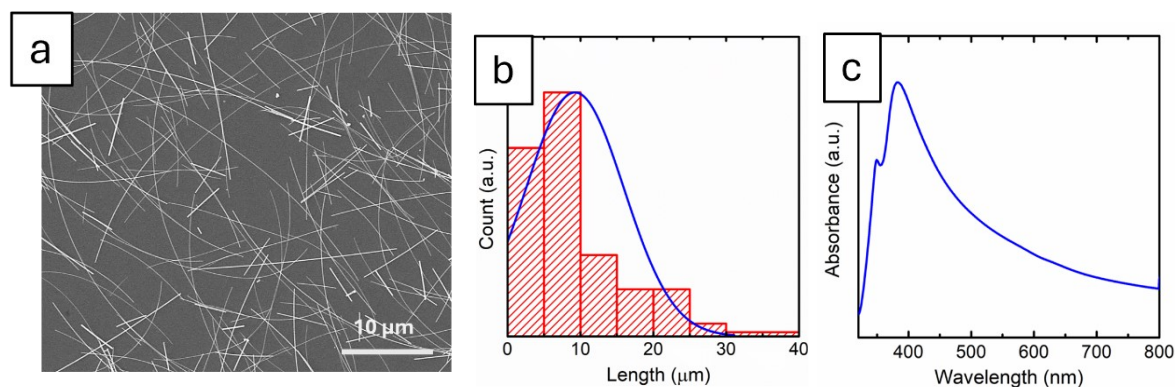

Figure S1. The SEM image (a), length size distribution graph (b), and the absorption spectrum (c) of the AgNWs. At least 100 number of AgNWs were measured for the statistic.

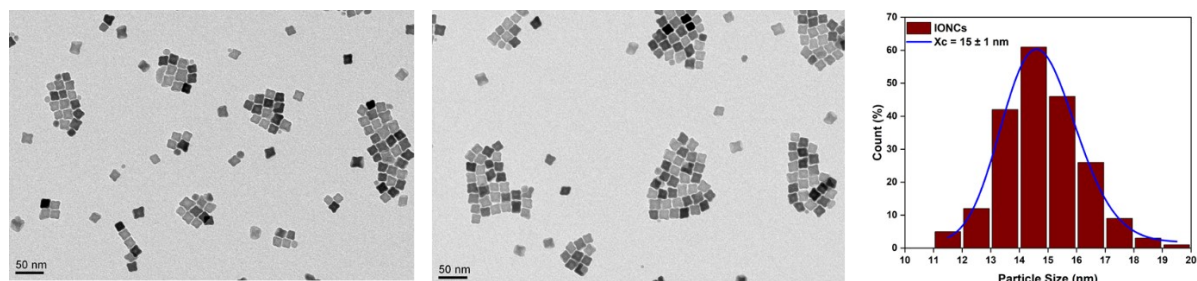

Figure S2. The particle size distribution of IONCs measured by statistical analysis on more than 200 objects selected from different TEM images.

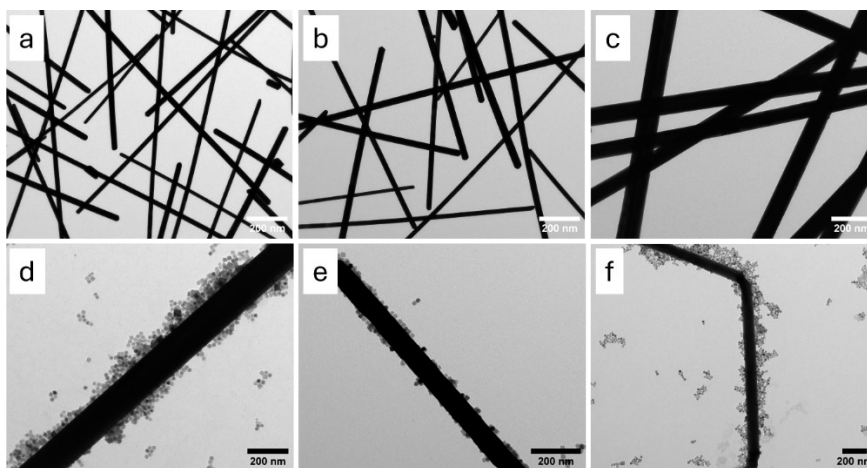

Figure S3. TEM images of re-synthesized AgNWs (a-c) and AgNWs@IONCs@PEI (d-f). The images demonstrate the reproducibility of our synthesis protocol in obtaining consistent morphologies across different batches.

### ***Surface modification of IONCs with polydopamine***

The surfaces of the IONCs ( $\sim 12$  nm) were modified with polydopamine (PD) via a ligand-exchange method. First, a 28 mM dopamine hydrochloride (DP.HCl) solution was prepared by dissolving DP.HCl in 3 mL of anhydrous dimethylformamide (DMF). Then, 0.0067 mL of triethylamine was added, and the mixture was vortex-mixed at 1200 rpm for 3 h at room temperature (RT). After this step, 0.150 mL of an IONCs in chloroform ( $2.85 \text{ mg}_{\text{Fe}} \cdot \text{mL}^{-1}$ ) was added and the mixture was vortex-mixed overnight at RT. The resulting product was centrifuged at 1500 rpm for 5 min, the supernatant was discarded, and the particles were washed twice with DMF to remove excess reagents. The PD-coated nanoparticles (IONCs@PD) were then redispersed in water and further purified using centrifugal membrane filters (Millipore Sigma, Amicon membrane filters of 100kDa MWCO, 4 mL volume filter (Ultra-4)). The dispersions were centrifuged at 900 rpm for 5 min and replenished with fresh water. This washing step was repeated five times.

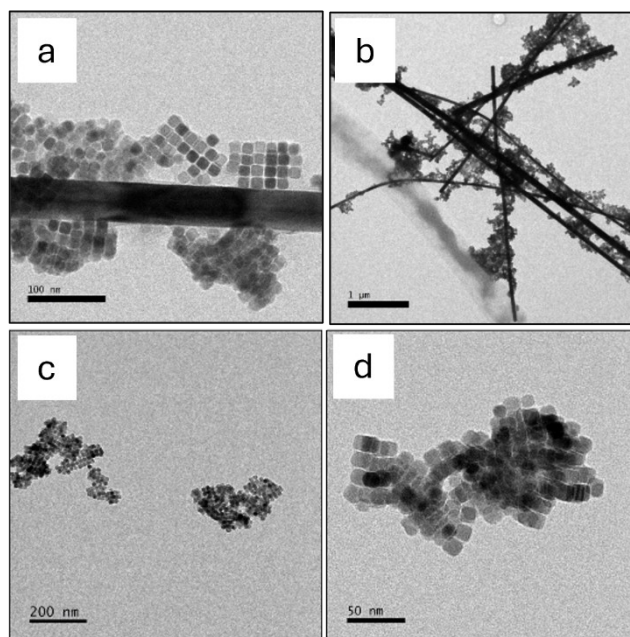

Figure S4. TEM images of AgNWs@IONCs@DP (a, b) and IONCs@PD (d,e) particles. The particle size distribution of IONCs@DP by intensity (c).

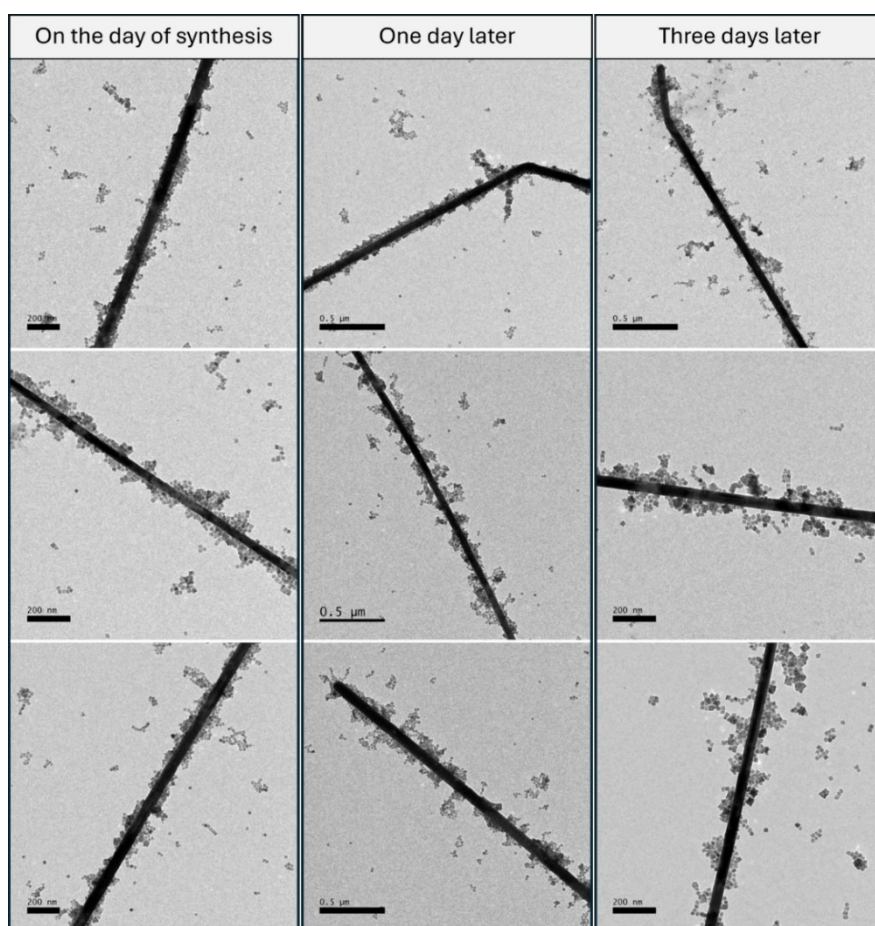

Figure S5. TEM images of AgNWs@IONCs@PEI composites over a three-day time. TEM images acquired immediately after synthesis (Day 0), after one day (Day 1), and after three days (Day 3).

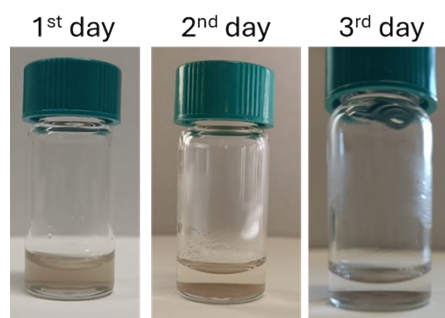

Figure S6. Photographs of the sample vials dispersed in water, showing the precipitation behavior of composites over time.

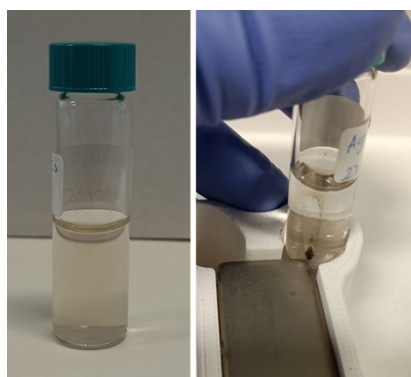

Figure S7. Typical photos of AgNWs@IONCs@PEI composites dispersion in water and after having kept them at the edge of a commercial permanent magnet (0.3T).

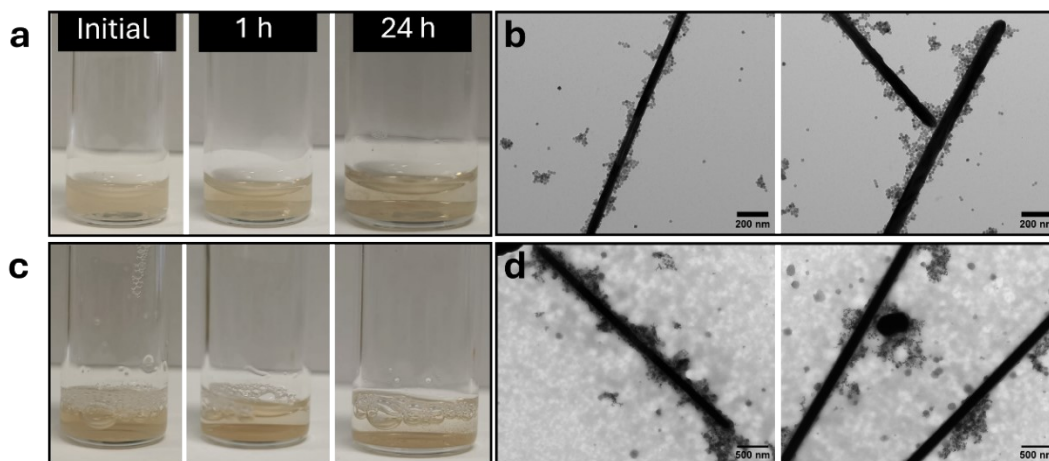

Figure S8. Photos of AgNWs@IONCs@PEI composites dispersed in PBS (at pH 6.5) (a) or in DMEM supplemented with 10% of FBS (c), photos taken right after the dispersion, after 1 h, and after 24 h. TEM images of AgNWs@IONCs@PEI composites dispersed in PBS (at pH 6.5) (b) or in DMEM supplemented with 10% of FBS (d), after incubation in these media for 24 h

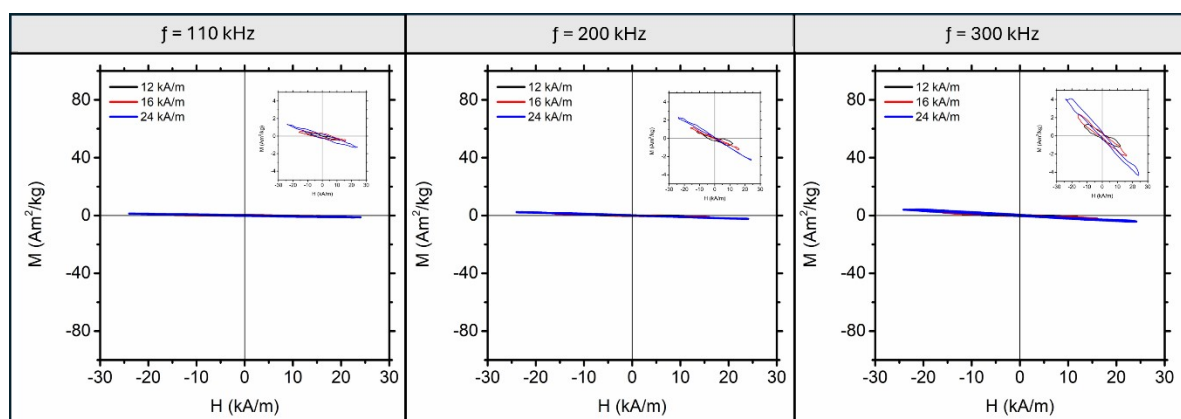

Figure S9. AC magnetometry measurements of AgNWs performed at different frequencies and magnetic field strength. The inset presents the corresponding magnetization curve on a reduced scale.

### ***Surface modification of IONCs with citrate molecules***

Surface modification with citrate molecules was implemented by following the reported protocols with some modifications.<sup>1,2</sup> 1ml of IONCs (16 nm) in Chloroform (5mgFe.mL<sup>-1</sup>) was mixed with 2 mL of aqueous solution of sodium Citrate (17.3 mM) to have a citrate molecule/surface area of IONCs ratio of 62 citrate ligand/nm<sup>2</sup>. The dispersion was shaken vigorously for 10-15 min and placed in a sonicator at 30-35°C for 60 min. Next, 5 mL of acetone was added to the dispersion to accelerate the separation of IONCs@citrate with a permanent magnet. The IONCs, collected as a black pellet at the magnet, was redispersed in 2mL of water and washed at least 5 times by centrifugation at 1200 rpm for 10 min on membrane-filtered centrifuge tubes (Millipore Sigma, Amicon membrane filters of 100kDa MWCO, 4 mL volume filter (Ultra-4)).



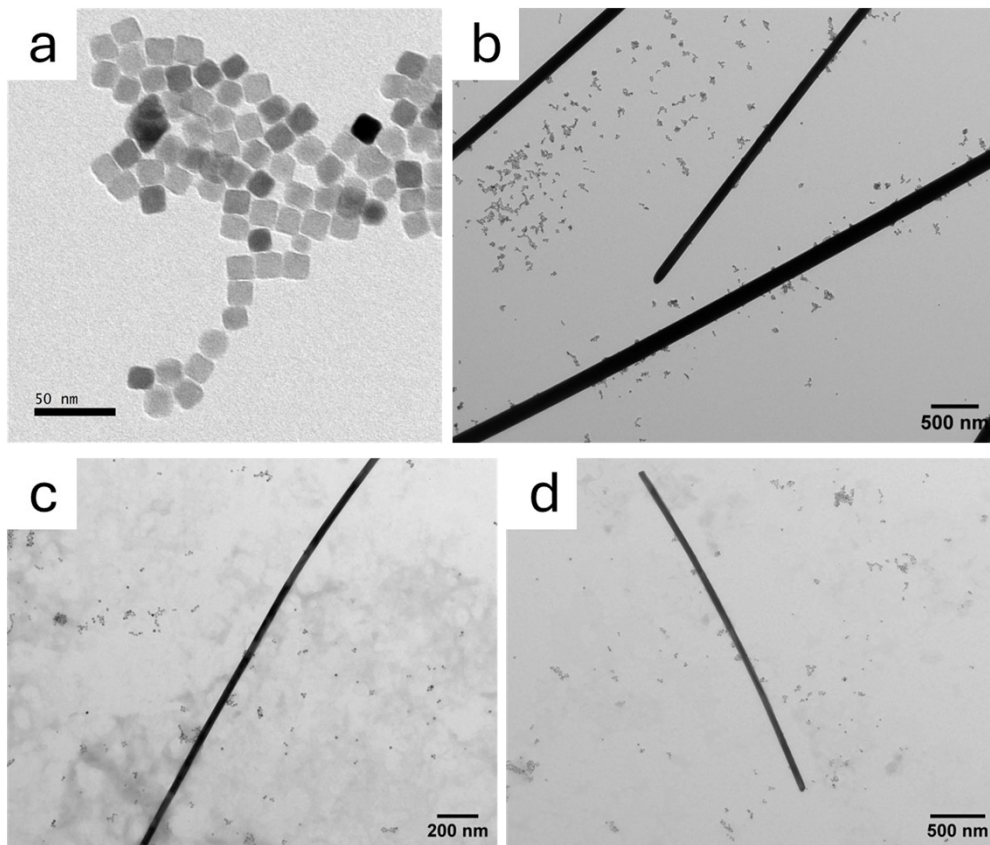

Figure S10. TEM images of IONCs@citrate (a) and Ag NWs with IONCs@citrate (AgNWs+IONCs@citrate) (b-d).

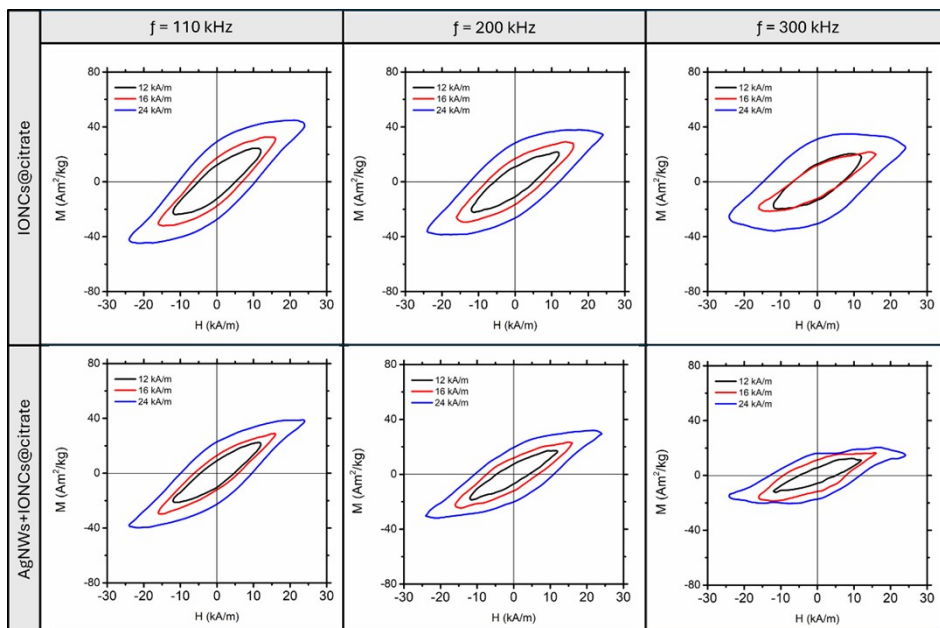

Figure S11. AC hysteresis loops of IONCs@citrate and AgNWs+IONCs@citrate under various frequencies and magnetic field strength. Each set of AC magnetometer measurements was repeated three times.

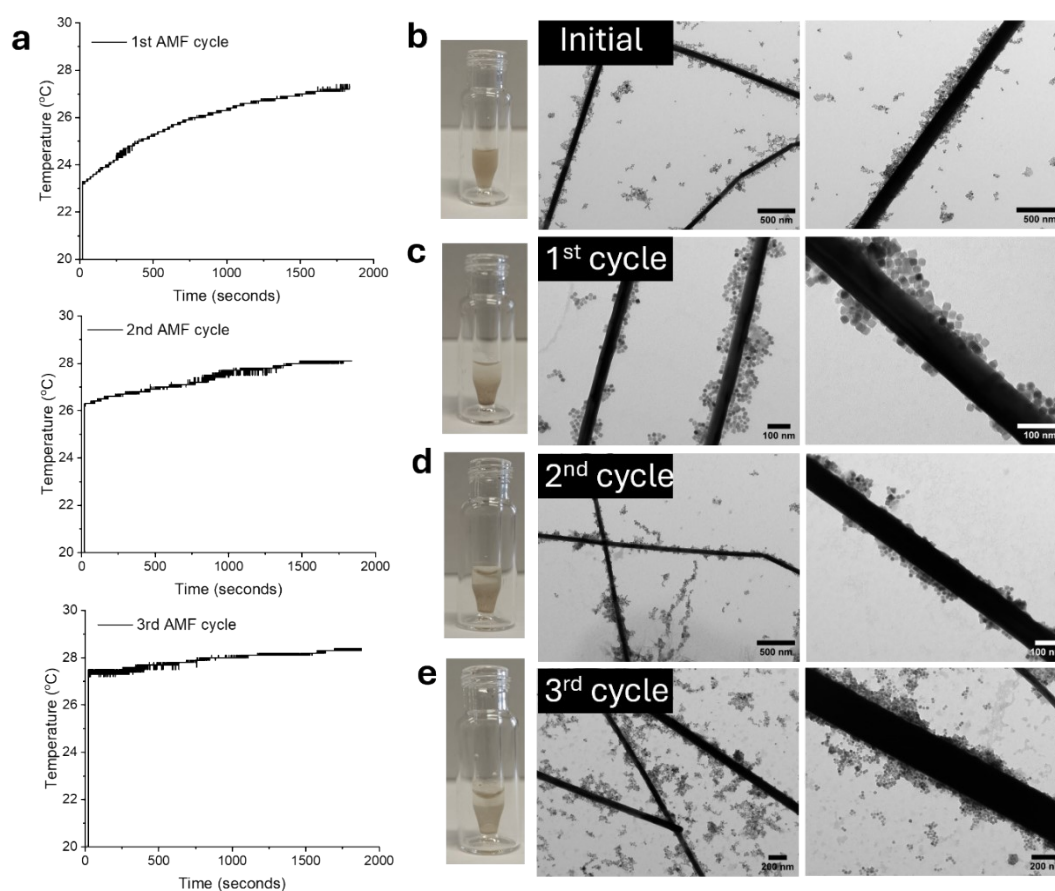

Figure S12. Heating profile of AgNWs@IONCs@PEI under AMF application at a frequency of 182 kHz and a field amplitude of  $39 \text{ kA.m}^{-1}$  for each of the three cycles (a), Photograph of the sample dispersion and corresponding TEM images before AMF application (b) and after 1<sup>st</sup>, 2<sup>nd</sup>, and 3<sup>rd</sup> cycle of AMF application, respectively (c-e).



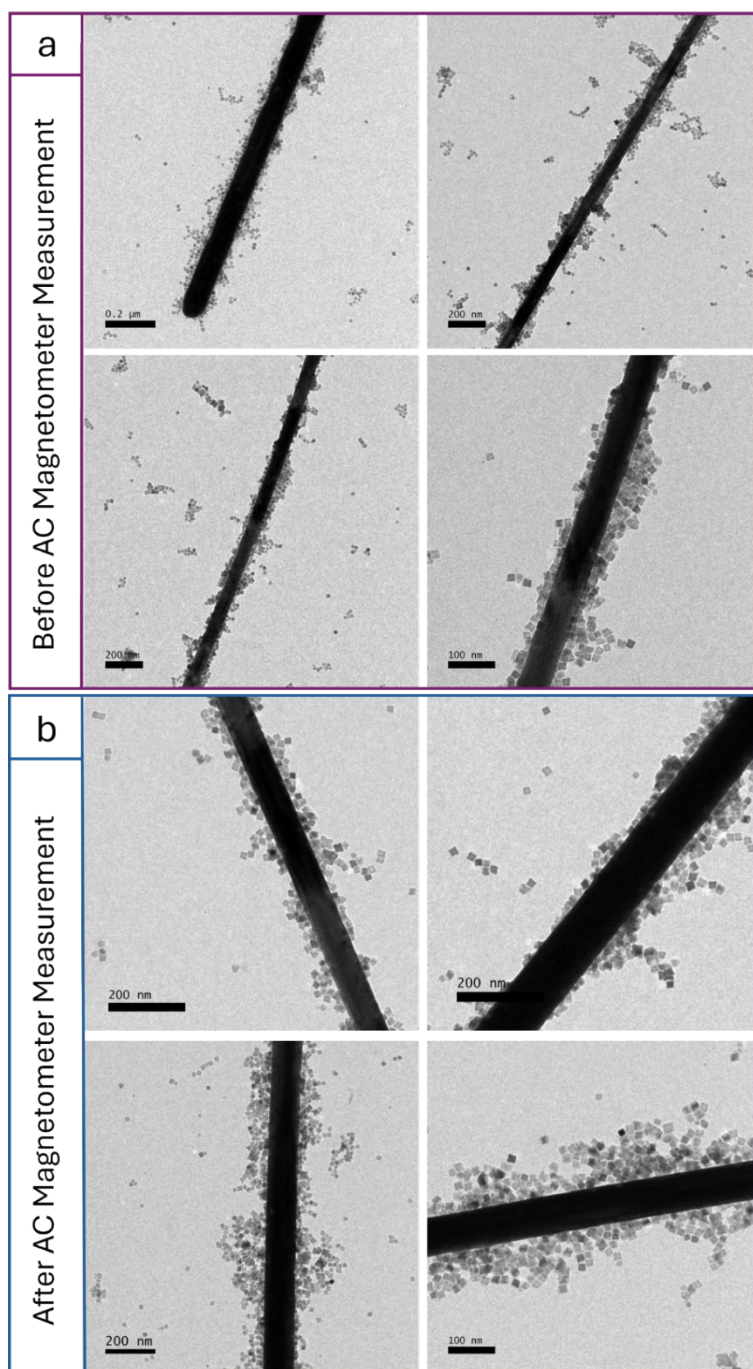

Figure S13. TEM images of the AgNWs@IONCs@PEI specimen before (a) and after (b) AC magnetometer measurement.

## Tables

Table S1. Relative percentage change of  $H_c$ ,  $M_s$ , area under the hysteresis loop (Area) and SAR values of samples.

| Frequency<br>(kHz) | $H_{app}$<br>(kA.m <sup>-1</sup> ) | $\Delta H_c$<br>(%)<br>(B/A) | $\Delta H_c$<br>(%)<br>(C/B) | $\Delta M_s$<br>(%)<br>(B/A) | $\Delta M_s$<br>(%)<br>(C/B) | $\Delta Area$<br>(%)<br>(B/A) | $\Delta Area$<br>(%)<br>(C/B) | $\Delta SAR$<br>(%)<br>(B/A) | $\Delta SAR$<br>(%)<br>(C/B) |
|--------------------|------------------------------------|------------------------------|------------------------------|------------------------------|------------------------------|-------------------------------|-------------------------------|------------------------------|------------------------------|
| <b>110</b>         | <b>12</b>                          | 24,14                        | 13,89                        | -26,07                       | -32,48                       | -13,93                        | -27,94                        | -13,48                       | -28,57                       |
|                    | <b>16</b>                          | 27,78                        | 28,26                        | -19,78                       | -26,05                       | -4,02                         | -7,28                         | -3,97                        | -8,26                        |
|                    | <b>24</b>                          | 31,91                        | 53,23                        | -18,18                       | -28,53                       | 0,61                          | 15,87                         | 0,51                         | 16,08                        |
| <b>200</b>         | <b>12</b>                          | 14,29                        | 12,50                        | -27,52                       | -32,58                       | -20,00                        | -28,33                        | -20,11                       | -27,97                       |
|                    | <b>16</b>                          | 16,67                        | 38,78                        | -21,97                       | -35,92                       | -13,37                        | -9,69                         | -13,28                       | -9,91                        |
|                    | <b>24</b>                          | 24,07                        | 67,16                        | -17,49                       | -35,79                       | -3,72                         | 18,00                         | -3,58                        | 17,77                        |
| <b>300</b>         | <b>12</b>                          | 10,81                        | 31,71                        | -27,84                       | -34,76                       | -24,53                        | -11,91                        | -24,35                       | -12,20                       |
|                    | <b>16</b>                          | 18,60                        | 39,22                        | -21,84                       | -33,08                       | -10,34                        | -5,40                         | -10,35                       | -5,47                        |
|                    | <b>24</b>                          | 24,14                        | 81,94                        | -16,71                       | -40,29                       | -2,76                         | 17,79                         | -2,72                        | 17,80                        |

A=IONCs@COOH, B= IONCs@PEI, C= AgNWs@IONCs@PEI

B/A: Relative percentage change of IONCs@PEI compared to IONCs@COOH

C/B: Relative percentage change of AgNWs@IONCs@PEI compared to IONCs@PEI

Table S2. Results of one-way ANOVA (F(2,6)) and Tukey's post-hoc test comparing SAR mean values of IONCs@COOH, IONCs@PEI, and AgNWs@IONCs@PEI samples. Different Tukey group letters (i.e., a, b, and c) were assigned to samples that were statistically significantly different from each other.

| Applied magnetic field condition | Sample                | SAR<br>(W.g <sup>-1</sup> Fe)<br>Mean ± SD | n              | Tukey Group<br>(p<0.05) | One-way ANOVA<br>F (2,6) | p-value                           |
|----------------------------------|-----------------------|--------------------------------------------|----------------|-------------------------|--------------------------|-----------------------------------|
| 110 kHz                          | 12 kA.m <sup>-1</sup> | IONCs@COOH                                 | 88,90 ± 0,79   | 3                       | a                        | 58,53<br>1.16 x 10 <sup>-4</sup>  |
|                                  |                       | IONCs@PEI                                  | 76,50 ± 1,04   | 3                       | b                        |                                   |
|                                  |                       | AgNWs@IONCs@PEI                            | 55,13 ± 6,57   | 3                       | c                        |                                   |
|                                  | 16 kA.m <sup>-1</sup> | IONCs@COOH                                 | 125,57 ± 1,88  | 3                       | a                        | 5,27<br>0,04777                   |
|                                  |                       | IONCs@PEI                                  | 120,53 ± 0,98  | 3                       | a,b                      |                                   |
|                                  |                       | AgNWs@IONCs@PEI                            | 111,73 ± 8,90  | 3                       | b                        |                                   |
|                                  | 24 kA.m <sup>-1</sup> | IONCs@COOH                                 | 197,83 ± 5,34  | 3                       | a                        | 11,52<br>0,00882                  |
|                                  |                       | IONCs@PEI                                  | 199,07 ± 2,93  | 3                       | a                        |                                   |
|                                  |                       | AgNWs@IONCs@PEI                            | 230,53 ± 15,21 | 3                       | b                        |                                   |
| 200 kHz                          | 12 kA.m <sup>-1</sup> | IONCs@COOH                                 | 179,27 ± 1,96  | 3                       | a                        | 27,56<br>9,46 x 10 <sup>-4</sup>  |
|                                  |                       | IONCs@PEI                                  | 143,37 ± 5,14  | 3                       | b                        |                                   |
|                                  |                       | AgNWs@IONCs@PEI                            | 102,80 ± 21,16 | 3                       | c                        |                                   |
|                                  | 16 kA.m <sup>-1</sup> | IONCs@COOH                                 | 256,27 ± 3,25  | 3                       | a                        | 112,65<br>1,75 x 10 <sup>-5</sup> |
|                                  |                       | IONCs@PEI                                  | 221,93 ± 0,25  | 3                       | b                        |                                   |
|                                  |                       | AgNWs@IONCs@PEI                            | 200,37 ± 7,27  | 3                       | c                        |                                   |
|                                  | 24 kA.m <sup>-1</sup> | IONCs@COOH                                 | 390,87 ± 12,53 | 3                       | a                        | 27,39<br>9,62 x 10 <sup>-4</sup>  |
|                                  |                       | IONCs@PEI                                  | 376,43 ± 7,83  | 3                       | a                        |                                   |
|                                  |                       | AgNWs@IONCs@PEI                            | 444,27 ± 14,19 | 3                       | b                        |                                   |
| 300 kHz                          | 12 kA.m <sup>-1</sup> | IONCs@COOH                                 | 270,77 ± 3,09  | 3                       | a                        | 53,24<br>1,52 x 10 <sup>-4</sup>  |
|                                  |                       | IONCs@PEI                                  | 204,47 ± 11,52 | 3                       | b                        |                                   |
|                                  |                       | AgNWs@IONCs@PEI                            | 180,17 ± 15,15 | 3                       | b                        |                                   |
|                                  | 16 kA.m <sup>-1</sup> | IONCs@COOH                                 | 366,53 ± 4,70  | 3                       | a                        | 3,44<br>0,10125                   |
|                                  |                       | IONCs@PEI                                  | 328,73 ± 9,66  | 3                       | a                        |                                   |
|                                  |                       | AgNWs@IONCs@PEI                            | 310,90 ± 44,70 | 3                       | a                        |                                   |
|                                  | 24 kA.m <sup>-1</sup> | IONCs@COOH                                 | 573,00 ± 34,24 | 3                       | a                        | 19,01<br>0,00253                  |
|                                  |                       | IONCs@PEI                                  | 589,17 ± 7,74  | 3                       | a                        |                                   |
|                                  |                       | AgNWs@IONCs@PEI                            | 675,10 ± 13,91 | 3                       | b                        |                                   |

**n:** The number of repeats of the measurement.

**Tukey Group (p<0.05):** If the sample groups are statistically significantly different from each other, they are assigned different Tukey group letters. If they share the same letter, it indicates that they are not statistically significantly different from each other.

**p-value: p<0.05** means that at least one group of sample mean differs significantly.

Table S3. Results of one-way ANOVA (F(2,6)) and Tukey's post-hoc test comparing SAR mean differences between two sets of samples. Tukey's multiple comparison test determines which specific pairs of groups show significant differences. Significant values are indicated as 1 for pairs of samples that differ significantly from each other, and 0 for those that do not.

| Applied magnetic field condition |                       | Means Comparison Tukey Test  | SAR Mean Diff. | p-value                 | Significant |
|----------------------------------|-----------------------|------------------------------|----------------|-------------------------|-------------|
| 110 kHz                          | 12 kA.m <sup>-1</sup> | IONCs@PEI - IONCs@COOH       | -12,40         | 0,01816                 | 1           |
|                                  |                       | AgNWs@IONCs@PEI - IONCs@COOH | -33,77         | 9,73 x 10 <sup>-5</sup> | 1           |
|                                  |                       | AgNWs@IONCs@PEI - IONCs@PEI  | -21,37         | 0,00124                 | 1           |
|                                  | 16 kA.m <sup>-1</sup> | IONCs@PEI - IONCs@COOH       | -5,03          | 0,51272                 | 0           |
|                                  |                       | AgNWs@IONCs@PEI - IONCs@COOH | -13,83         | 0,04222                 | 1           |
|                                  |                       | AgNWs@IONCs@PEI - IONCs@PEI  | -8,80          | 0,18348                 | 0           |
|                                  | 24 kA.m <sup>-1</sup> | IONCs@PEI - IONCs@COOH       | 1,23           | 0,98607                 | 0           |
|                                  |                       | AgNWs@IONCs@PEI - IONCs@COOH | 32,70          | 0,01293                 | 1           |
|                                  |                       | AgNWs@IONCs@PEI - IONCs@PEI  | 31,47          | 0,0154                  | 1           |
| 200 kHz                          | 12 kA.m <sup>-1</sup> | IONCs@PEI - IONCs@COOH       | -35,90         | 0,03029                 | 1           |
|                                  |                       | AgNWs@IONCs@PEI - IONCs@COOH | -76,47         | 7,54 x 10 <sup>-4</sup> | 1           |
|                                  |                       | AgNWs@IONCs@PEI - IONCs@PEI  | -40,57         | 0,01797                 | 1           |
|                                  | 16 kA.m <sup>-1</sup> | IONCs@PEI - IONCs@COOH       | -34,33         | 2,37 x 10 <sup>-4</sup> | 1           |
|                                  |                       | AgNWs@IONCs@PEI - IONCs@COOH | -55,90         | 1,43 x 10 <sup>-5</sup> | 1           |
|                                  |                       | AgNWs@IONCs@PEI - IONCs@PEI  | -21,57         | 0,00293                 | 1           |
|                                  | 24 kA.m <sup>-1</sup> | IONCs@PEI - IONCs@COOH       | -14,43         | 0,35759                 | 0           |
|                                  |                       | AgNWs@IONCs@PEI - IONCs@COOH | 53,40          | 0,00355                 | 1           |
|                                  |                       | AgNWs@IONCs@PEI - IONCs@PEI  | 67,83          | 0,00101                 | 1           |
| 300 kHz                          | 12 kA.m <sup>-1</sup> | IONCs@PEI - IONCs@COOH       | -66,30         | 8,26 x 10 <sup>-4</sup> | 1           |
|                                  |                       | AgNWs@IONCs@PEI - IONCs@COOH | -90,60         | 1,45 x 10 <sup>-4</sup> | 1           |
|                                  |                       | AgNWs@IONCs@PEI - IONCs@PEI  | -24,30         | 0,08188                 | 0           |
|                                  | 16 kA.m <sup>-1</sup> | IONCs@PEI - IONCs@COOH       | -37,80         | 0,26535                 | 0           |
|                                  |                       | AgNWs@IONCs@PEI - IONCs@COOH | -55,63         | 0,09371                 | 0           |
|                                  |                       | AgNWs@IONCs@PEI - IONCs@PEI  | -17,83         | 0,70375                 | 0           |
|                                  | 24 kA.m <sup>-1</sup> | IONCs@PEI - IONCs@COOH       | -16,17         | 0,65531                 | 0           |
|                                  |                       | AgNWs@IONCs@PEI - IONCs@COOH | 85,93          | 0,00697                 | 1           |
|                                  |                       | AgNWs@IONCs@PEI - IONCs@PEI  | 102,10         | 0,00295                 | 1           |

Table S4. Results of one-way ANOVA (F(1,4)) and Tukey's post-hoc test comparing H<sub>c</sub> mean values of IONCs@PEI and AgNWs@IONCs@PEI samples.

| Applied magnetic field condition |                       | Sample          | H <sub>c</sub><br>Mean ± SD | n | Tukey Group<br>(p<0.05) | One-way ANOVA<br>F (1,4) | p-value                    |
|----------------------------------|-----------------------|-----------------|-----------------------------|---|-------------------------|--------------------------|----------------------------|
| 110 kHz                          | 12 kA.m <sup>-1</sup> | IONCs@PEI       | 3,63 ± 0,06                 | 3 | a                       | 2,19                     | 0,2126                     |
|                                  |                       | AgNWs@IONCs@PEI | 4,07 ± 0,5                  | 3 | a                       |                          |                            |
|                                  | 16 kA.m <sup>-1</sup> | IONCs@PEI       | 4,57 ± 0,06                 | 3 | a                       | 98,88                    | 5,74363 x 10 <sup>-4</sup> |
|                                  |                       | AgNWs@IONCs@PEI | 5,93 ± 0,23                 | 3 | b                       |                          |                            |
|                                  | 24 kA.m <sup>-1</sup> | IONCs@PEI       | 6,20 ± 0,00                 | 3 | a                       | 784,69                   | 9,73421 x 10 <sup>-6</sup> |
|                                  |                       | AgNWs@IONCs@PEI | 9,57 ± 0,21                 | 3 | b                       |                          |                            |
| 200 kHz                          | 12 kA.m <sup>-1</sup> | IONCs@PEI       | 4,03 ± 0,06                 | 3 | a                       | 2,81                     | 0,16884                    |
|                                  |                       | AgNWs@IONCs@PEI | 4,53 ± 0,51                 | 3 | a                       |                          |                            |
|                                  | 16 kA.m <sup>-1</sup> | IONCs@PEI       | 4,93 ± 0,06                 | 3 | a                       | 605,00                   | 1,62404 x 10 <sup>-5</sup> |
|                                  |                       | AgNWs@IONCs@PEI | 6,77 ± 0,12                 | 3 | b                       |                          |                            |
|                                  | 24 kA.m <sup>-1</sup> | IONCs@PEI       | 6,63 ± 0,06                 | 3 | a                       | 2278,13                  | 1,19597 x 10 <sup>-6</sup> |
|                                  |                       | AgNWs@IONCs@PEI | 11,13 ± 0,15                | 3 | b                       |                          |                            |
| 300 kHz                          | 12 kA.m <sup>-1</sup> | IONCs@PEI       | 4,10 ± 0,10                 | 3 | a                       | 29,82                    | 0,00547                    |
|                                  |                       | AgNWs@IONCs@PEI | 5,40 ± 0,40                 | 3 | b                       |                          |                            |
|                                  | 16 kA.m <sup>-1</sup> | IONCs@PEI       | 5,13 ± 0,06                 | 3 | a                       | 11,92                    | 0,02599                    |
|                                  |                       | AgNWs@IONCs@PEI | 7,10 ± 0,98                 | 3 | b                       |                          |                            |
|                                  | 24 kA.m <sup>-1</sup> | IONCs@PEI       | 7,16 ± 0,25                 | 3 | a                       | 106,32                   | 4,9915 x 10 <sup>-4</sup>  |
|                                  |                       | AgNWs@IONCs@PEI | 13,10 ± 0,96                | 3 | b                       |                          |                            |

Table S5. Results of one-way ANOVA (F(1,4)) and Tukey's post-hoc test comparing H<sub>c</sub> mean values of IONCs@citrate and AgNWs+IONCs@citrate samples. Each set of AC magnetometer measurements was repeated three times.

| Applied magnetic field condition |                       | Sample              | H <sub>c</sub><br>Mean ± SD | n | Tukey Group<br>(p<0.05) | One-way ANOVA<br>F (1,4) | p-value |
|----------------------------------|-----------------------|---------------------|-----------------------------|---|-------------------------|--------------------------|---------|
| 110 kHz                          | 12 kA.m <sup>-1</sup> | IONCs@citrate       | 5,07 ± 0,55                 | 3 | a                       | 0,75                     | 0,43423 |
|                                  |                       | AgNWs+IONCs@citrate | 4,67 ± 0,58                 | 3 | a                       |                          |         |
|                                  | 16 kA.m <sup>-1</sup> | IONCs@citrate       | 6,8 ± 0,46                  | 3 | a                       | 4,00                     | 0,11612 |
|                                  |                       | AgNWs+IONCs@citrate | 6,0 ± 0,52                  | 3 | a                       |                          |         |
|                                  | 24 kA.m <sup>-1</sup> | IONCs@citrate       | 10,53 ± 0,50                | 3 | a                       | 5,38                     | 0,08112 |
|                                  |                       | AgNWs+IONCs@citrate | 9,73 ± 0,32                 | 3 | a                       |                          |         |
| 200 kHz                          | 12 kA.m <sup>-1</sup> | IONCs@citrate       | 5,47 ± 0,57                 | 3 | a                       | 9,24                     | 0,03841 |
|                                  |                       | AgNWs+IONCs@citrate | 4,43 ± 0,15                 | 3 | b                       |                          |         |
|                                  | 16 kA.m <sup>-1</sup> | IONCs@citrate       | 7,70 ± 0,75                 | 3 | a                       | 0,55                     | 0,50005 |
|                                  |                       | AgNWs+IONCs@citrate | 7,00 ± 1,45                 | 3 | a                       |                          |         |
|                                  | 24 kA.m <sup>-1</sup> | IONCs@citrate       | 12,27 ± 0,76                | 3 | a                       | 6,71                     | 0,06072 |
|                                  |                       | AgNWs+IONCs@citrate | 10,77 ± 0,65                | 3 | a                       |                          |         |
| 300 kHz                          | 12 kA.m <sup>-1</sup> | IONCs@citrate       | 270,77 ± 3,09               | 3 | a                       | 1,09                     | 0,35536 |
|                                  |                       | AgNWs+IONCs@citrate | 204,47 ± 11,52              | 3 | a                       |                          |         |
|                                  | 16 kA.m <sup>-1</sup> | IONCs@citrate       | 7 ± 1,01                    | 3 | a                       | 4,18                     | 0,11036 |
|                                  |                       | AgNWs+IONCs@citrate | 8,67 ± 0,98                 | 3 | a                       |                          |         |
|                                  | 24 kA.m <sup>-1</sup> | IONCs@citrate       | 14,47 ± 3,04                | 3 | a                       | 1,29                     | 0,31902 |
|                                  |                       | AgNWs+IONCs@citrate | 12,3 ± 1,28                 | 3 | a                       |                          |         |

Table S6. Results of one-way ANOVA (F(1,4)) and Tukey's post-hoc test comparing SAR mean values of IONCs@citrate and AgNWs+IONCs@citrate samples. Each set of AC magnetometer measurements was repeated three times.



| Applied magnetic field condition |                       | Sample              | SAR<br>(W.g <sup>-1</sup> F <sub>0</sub> )<br>Mean ± SD | n | Tukey Group<br>(p<0.05) | One-way ANOVA<br>F (1,4) | p-value |
|----------------------------------|-----------------------|---------------------|---------------------------------------------------------|---|-------------------------|--------------------------|---------|
| 110 kHz                          | 12 kA.m <sup>-1</sup> | IONCs@citrate       | 56,63 ± 5,16                                            | 3 | a                       | 10,61                    | 0,03117 |
|                                  |                       | AgNWs+IONCs@citrate | 44,00 ± 4,30                                            | 3 | b                       |                          |         |
|                                  | 16 kA.m <sup>-1</sup> | IONCs@citrate       | 101,93 ± 10,52                                          | 3 | a                       | 12,23                    | 0,02495 |
|                                  |                       | AgNWs+IONCs@citrate | 73,57 ± 9,30                                            | 3 | b                       |                          |         |
|                                  | 24 kA.m <sup>-1</sup> | IONCs@citrate       | 230,20 ± 16,71                                          | 3 | a                       | 20,62                    | 0,01049 |
|                                  |                       | AgNWs+IONCs@citrate | 179,07 ± 10,06                                          | 3 | b                       |                          |         |
| 200 kHz                          | 12 kA.m <sup>-1</sup> | IONCs@citrate       | 91,97 ± 4,72                                            | 3 | a                       | 45,68                    | 0,0025  |
|                                  |                       | AgNWs+IONCs@citrate | 61,20 ± 6,32                                            | 3 | b                       |                          |         |
|                                  | 16 kA.m <sup>-1</sup> | IONCs@citrate       | 182,53 ± 24,53                                          | 3 | a                       | 4,61                     | 0,09818 |
|                                  |                       | AgNWs+IONCs@citrate | 130,80 ± 33,74                                          | 3 | a                       |                          |         |
|                                  | 24 kA.m <sup>-1</sup> | IONCs@citrate       | 412,77 ± 30,86                                          | 3 | a                       | 16,92                    | 0,01469 |
|                                  |                       | AgNWs+IONCs@citrate | 292,83 ± 39,97                                          | 3 | a                       |                          |         |
| 300 kHz                          | 12 kA.m <sup>-1</sup> | IONCs@citrate       | 169,23 ± 24,77                                          | 3 | a                       | 12,18                    | 0,02512 |
|                                  |                       | AgNWs+IONCs@citrate | 73,17 ± 40,74                                           | 3 | b                       |                          |         |
|                                  | 16 kA.m <sup>-1</sup> | IONCs@citrate       | 190,70 ± 52,04                                          | 3 | a                       | 0,02                     | 0,88487 |
|                                  |                       | AgNWs+IONCs@citrate | 185,13 ± 34,62                                          | 3 | a                       |                          |         |
|                                  | 24 kA.m <sup>-1</sup> | IONCs@citrate       | 704,30 ± 298,37                                         | 3 | a                       | 3,70                     | 0,12691 |
|                                  |                       | AgNWs+IONCs@citrate | 347,17 ± 120,44                                         | 3 | a                       |                          |         |

## References

- (1) Vassallo, M., Martella, D., Barrera, G., Celegato, F., Coisson, M., Ferrero, R., ... & Manzin, A. (2023). Improvement of hyperthermia properties of iron oxide nanoparticles by surface coating. *ACS omega*, 8(2), 2143-2154.
- (2) Arndt, D., Gesing, T. M., & Bäumer, M. (2012). Surface functionalization of iron oxide nanoparticles and their stability in different media. *ChemPlusChem*, 77(7), 576-583.
